# Supplementary material for: The Human Blood-Nerve Barrier Transcriptome
Source: PubMed Central journal article supplement (PMC5727190; doi:10.1038/s41598-017-17475-y), 2017-12-12
Supplement: 41598_2017_17475_MOESM1_ESM.pdf [file 41598_2017_17475_MOESM1_ESM.pdf]

# The Human Blood-Nerve Barrier Transcriptome

Steven P. Palladino, E. Scott Helton, Preti Jain, Chaoling Dong, Michael R. Crowley, David K. Crossman, Eroboghene E. Ubogu

## Supplementary Materials (Key):

**Data files S1-S6:** Header description is as follows: **Signf-p-value:** Significant enrichment p-value; **T:** Total number of genes associated to functional term; **Q:** Number of genes in input list. This varies when list is ordered and optimum list length is detected ; **Q&T:** Number of genes in the list associated to functional term; **Q&T/Q:** Fraction of genes in list with the functional term (precision); **Q&T/T:** Fraction of all functional genes detected in the list (recall); **term ID:** term identification; **t type:** term type or GO domain (BP= Biological Process, CC= Cellular Component, MF=Molecular Function), **t group:** term group; **t name:** term name; **t depth:** term depth; **Q&T list:** list of genes in the list associated to functional term.
